# Supplementary material for: Genetic screening method for analyzing survival motor neuron copy number in spinal muscular atrophy by multiplex ligation-dependent probe amplification and droplet digital polymerase chain reaction
Source: PubMed Central journal article supplement — Chin Med J (Engl). 2020 Sep 21;133(20):2510–1. doi: 10.1097/CM9.0000000000001102 (PMC7575165; doi:10.1097/cm9.0000000000001102), 2020-09-21
Supplement: cm9-133-2510-s001.pdf [file cm9-133-2510-s001.pdf]

**Supplementary Table 1: SMA genetic screening results for copy numbers of *SMN*.**

| Gene           | Sample                 | Phenotype                                          | MLPA   |             |        |             | ddPCR  |             |        |             |
|----------------|------------------------|----------------------------------------------------|--------|-------------|--------|-------------|--------|-------------|--------|-------------|
|                |                        |                                                    | Test 1 |             | Test 2 |             | Test 1 |             | Test 2 |             |
|                |                        |                                                    | Ratio  | Copy Number |
| <i>SMN1-E7</i> |                        |                                                    |        |             |        |             |        |             |        |             |
|                | P-1*                   | SMA Type I                                         | 0      | 0           | 0      | 0           | 0.01   | 0           | 0      | 0           |
|                | P-2                    | SMA Type II                                        | 0      | 0           | 0      | 0           | 0      | 0           | 0      | 0           |
|                | P-3                    | SMA Type III                                       | 0      | 0           | 0      | 0           | 0.01   | 0           | 0.01   | 0           |
|                | P-4                    | SMA Type III                                       | 0      | 0           | 0      | 0           | 0      | 0           | 0      | 0           |
|                | P-5                    | SMA Type III                                       | 0      | 0           | 0      | 0           | 0      | 0           | 0      | 0           |
|                | P-6                    | SMA Type III                                       | 0      | 0           | 0      | 0           | 0      | 0           | 0      | 0           |
|                | P-7                    | <i>SMN1</i> (1+0) carrier <sup>†</sup>             | 0.52   | 1           | 0.63   | 1           | 0.97   | 1           | 0.95   | 1           |
|                | P-8                    | <i>SMN1</i> (1+0) carrier                          | 0.49   | 1           | 0.6    | 1           | 0.96   | 1           | 0.99   | 1           |
|                | P-9                    | <i>SMN1</i> (1+0) carrier                          | 0.44   | 1           | 0.56   | 1           | 0.8    | 1           | 0.83   | 1           |
|                | P-10                   | Normal Control                                     | 1.15   | 2           | 1.37   | 3           | 2.01   | 2           | 1.98   | 2           |
|                | F1-II-1 <sup>‡</sup>   | SMA-asymptomatic                                   | 0.05   | 0           | 0      | 0           | 0      | 0           | 0      | 0           |
|                | F1-II-1-f <sup>§</sup> | SMA-asymptomatic                                   | 0      | 0           | 0      | 0           | /      | 0           | /      | 0           |
|                | F1-II-2                | SMA Type III                                       | 0.05   | 0           | 0      | 0           | 0.01   | 0           | 0.01   | 0           |
|                | F1-II-2-f              | SMA Type III                                       | 0      | 0           |        |             | /      | 0           | /      | 0           |
|                | F2-II-1                | <i>SMN1</i> (1+0) carrier                          | 0.43   | 1           | 0.54   | 1           | 1.1    | 1           | 1.09   | 1           |
|                | F2-II-2                | <i>SMN1</i> (c.844C>T+1) carrier <sup>  </sup>     | 1.05   | 2           | 1.29   | 2-3         | 1.04   | 1           | 1.06   | 1           |
|                | F2-II-3                | <i>SMN1</i> (c.844C>T+1) carrier                   | 0.72   | 1-2         | 0.87   | 2           | 0.87   | 1           | 0.91   | 1           |
|                | F2-II-4                | <i>SMN1</i> (1+0) carrier                          | 0.48   | 1           | 0.6    | 1           | 0.84   | 1           | 0.86   | 1           |
|                | F2-III-2               | <i>SMN1</i> (c.844C>T+1) carrier                   | 1.18   | 2           | 1.41   | 3           | 1.03   | 1           | 1.06   | 1           |
|                | F2-III-4               | SMA Type I <i>SMN1</i> (c.844C>T+0) <sup>¶</sup>   | 0.55   | 1           | 0.68   | 1-2         | 0      | 0           | 0      | 0           |
|                | F3-I-1                 | <i>SMN1</i> (2+0) carrier <sup>**</sup>            | 1      | 2           | 1.24   | 2-3         | 1.91   | 2           | 1.89   | 2           |
|                | F3-I-2                 | <i>SMN1</i> (c.815A>G+1) carrier <sup>††</sup>     | 1.04   | 2           | 1.29   | 2-3         | 1.97   | 2           | 1.95   | 2           |
|                | F3-II-1                | SMA Type II <i>SMN1</i> (c.815A>G+0) <sup>**</sup> | 0.51   | 1           | 0.62   | 1           | 0.97   | 1           | 0.97   | 1           |
|                | i-1 <sup>§§</sup>      | SMA Type I                                         | 0.08   | 0           | 0      | 0           | 0      | 0           | 0      | 0           |
|                | i-2                    | SMA Type I                                         | 0      | 0           | 0      | 0           | /      | 0           | 0      | 0           |
|                | i-3                    | SMA Type II                                        | 0      | 0           | 0      | 0           | 0.01   | 0           | 0.01   | 0           |
|                | SD-019                 | Reference Selection DNA                            | 1.04   | 2           | 0.97   | 2           | 1.96   | 2           | 2.1    | 2           |
| <i>SMN2-E7</i> |                        |                                                    |        |             |        |             |        |             |        |             |
|                | P-1                    | SMA Type I                                         | 1.58   | 3           | 2.01   | 4           | 2.97   | 3           | 3.02   | 3           |
|                | P-2                    | SMA Type II                                        | 1.47   | 3           | 2.03   | 4           | 2.89   | 3           | 3.05   | 3           |
|                | P-3                    | SMA Type III                                       | 1.67   | 2-3         | 2.18   | >4          | 3.07   | 3           | 3.03   | 3           |
|                | P-4                    | SMA Type III                                       | 4.02   | >4          | 2.83   | >4          | 3.98   | 4           | 3.9    | 4           |
|                | P-5                    | SMA Type III                                       | 1.48   | 3           | 1.99   | 4           | 3.02   | 3           | 2.92   | 3           |

|           |                                          |      |     |      |     |      |   |      |   |
|-----------|------------------------------------------|------|-----|------|-----|------|---|------|---|
| P-6       | SMA Type III                             | 2.22 | > 4 | 2.97 | > 4 | 3.82 | 4 | 4.04 | 4 |
| P-7       | <i>SMNI</i> (1+0) carrier                | 1.44 | 3   | 1.82 | 4   | 1.99 | 2 | 1.99 | 2 |
| P-8       | <i>SMNI</i> (1+0) carrier                | 1.04 | 2   | 1.38 | 3   | 1.97 | 2 | 1.97 | 2 |
| P-9       | <i>SMNI</i> (1+0) carrier                | 0.94 | 2   | 1.25 | 2-3 | 1.71 | 2 | 1.7  | 2 |
| P-10      | Normal Control                           | 0.48 | 1   | 0.51 | 1   | 0.99 | 1 | 1    | 1 |
| F1-II-1   | SMA-asymptomatic                         | 1.2  | 2   | 2.1  | 4   | 3.93 | 4 | 3.88 | 4 |
| F1-II-1-f | SMA-asymptomatic                         | 1.74 | 3-4 | 1.85 | 4   | 3.85 | 4 | 3.99 | 4 |
| F1-II-2   | SMA Type III                             | 1.76 | 4   | 1.91 | 4   | 3.82 | 4 | 3.88 | 4 |
| F1-II-2-f | SMA Type III                             | 4.46 | > 4 |      |     | 3.88 | 4 | 3.96 | 4 |
| F2-II-1   | <i>SMNI</i> (1+0) carrier                | 1.07 | 2   | 1.4  | 3   | 2.04 | 2 | 2.05 | 2 |
| F2-II-2   | (c.844C>T+1) carrier<br><i>SMNI</i>      | 1.11 | 2   | 1.42 | 3   | 2.08 | 2 | 2.03 | 2 |
| F2-II-3   | (c.844C>T+1) carrier<br><i>SMNI</i>      | 0.99 | 2   | 1.27 | 2-3 | 1.85 | 2 | 1.92 | 2 |
| F2-II-4   | <i>SMNI</i> (1+0) carrier                | 1.06 | 2   | 1.38 | 3   | 1.8  | 2 | 1.91 | 2 |
| F2-III-2  | (c.844C>T+1) carrier<br><i>SMNI</i>      | 1.14 | 2   | 1.42 | 3   | 2.09 | 2 | 2.09 | 2 |
| F2-III-4  | SMA Type I<br><i>SMNI</i> (c.844C>T+0)   | 0.69 | 1-2 | 0.83 | 2   | 2.22 | 2 | 2.22 | 2 |
| F3-I-1    | <i>SMNI</i> (2+0) carrier<br><i>SMNI</i> | 1.72 | 3-4 | 2.17 | > 4 | 3.02 | 3 | 2.91 | 3 |
| F3-I-2    | (c.815G>A+1) carrier<br><i>SMNI</i>      | 1.09 | 2   | 1.42 | 3   | 1.96 | 2 | 1.98 | 2 |
| F3-II-1   | SMA Type II<br><i>SMNI</i> (c.815G>A+0)  | 1.69 | 3-4 | 2.17 | > 4 | 2.89 | 3 | 2.93 | 3 |
| i-1       | SMA Type I                               | 1    | 2   | 1.34 | 3   | 2.06 | 2 | 2.1  | 2 |
| i-2       | SMA Type I                               | 2.88 | > 4 | 3.12 | > 4 | 3.01 | 3 | 3.04 | 3 |
| i-3       | SMA Type II                              | 2.53 | > 4 | 2.53 | > 4 | 3.09 | 3 | 3.07 | 3 |
| SD-019    | Reference Selection DNA                  | 1.07 | 2   | 0.99 | 2   | 2.04 | 2 | 2.01 | 2 |

\*P: PBMC (Peripheral Blood Mononuclear Cells); † *SMNI* (1+0) carrier: heterogeneous deletion of *SMNI*; ‡ F: Family; § f: fibroblast; || *SMNI* (c.844C>T+1) carrier: have two copies of *SMNI* with one variant c. 844C>T; ¶ *SMNI* (c.844C>T+0): have one copy of *SMNI* with the variant c. 844C>T; \*\* *SMNI* (2+0) carrier: an allele that contains an *SMNI* duplication in cis, while the other allele contains no *SMNI*; †† *SMNI* (c.815A>G+1) carrier: have two copies of *SMNI* with one variant c.815A>G; †† *SMNI* (c.815A>G+0): have one copy of *SMNI* with the variant c.815A>G; §§ i: iPSCs (induced Pluripotent Stem Cells).
